# Supplementary material
Source: publisher site journal article supplement (https://www.dovepress.com/article/257679)

**Supplementary Figure S1.** Receiver operating curve of flow-mediated dilation (FMD) and pulse wave velocity (PWV) to detect the presence of pulmonary vascular disease (PVD) in the subject cohort. a) FMD <4.5% of baseline diameter was identified as the best predictor of PVD (sensitivity 77%, specificity 75%; area under the curve, AUC, 0.815); b) PWV >10.35 m/s was identified as the best predictor of PVD (sensitivity 87%, specificity 72%; AUC 0.803).

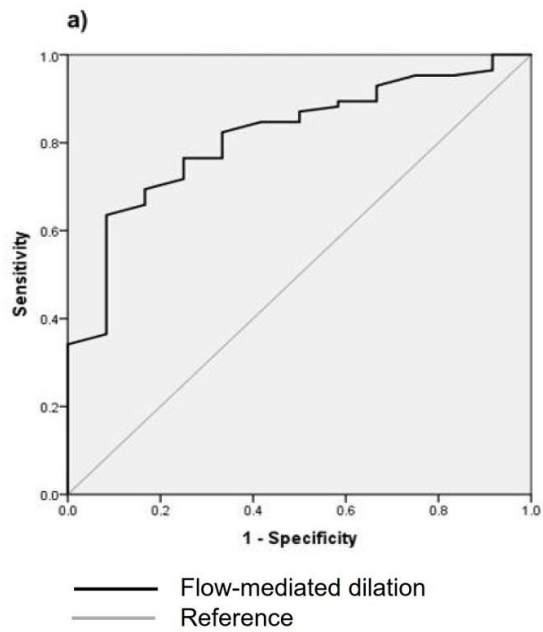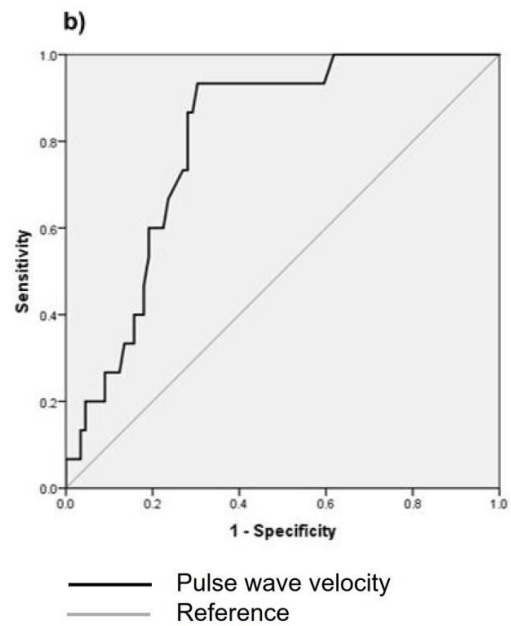

Supplement: Supplementary file 1 [file get_supplementary_file.php]
